# Supplementary material for: An electroanalytical approach for the detection of 2,4-diaminotoluene based on electrochemically reduced graphene oxide–carboxylic single walled carbon nanotubes
Source: Royal Society of Chemistry journal article supplement (doi:10.1039/d5nj00053j), 2025-01-01
Supplement: d5nj00053j1.pdf [file d5nj00053j1.pdf]

**Electroanalytical approach for the detection of 2,4-diaminotoluene  
based on electrochemically reduced graphene oxide-carboxylic single  
walled carbon nanotubes**

Yujie Wang, Keyu Chen, Guodong Cheng, Sitian Du, Fei Wang\*

School of Chemical and Printing-Dyeing Engineering, Henan University of Engineering, Zhengzhou,  
450007, P R China

\*Corresponding authors. E-mail: wf2003@haue.edu.cn (*Prof.* Fei Wang)

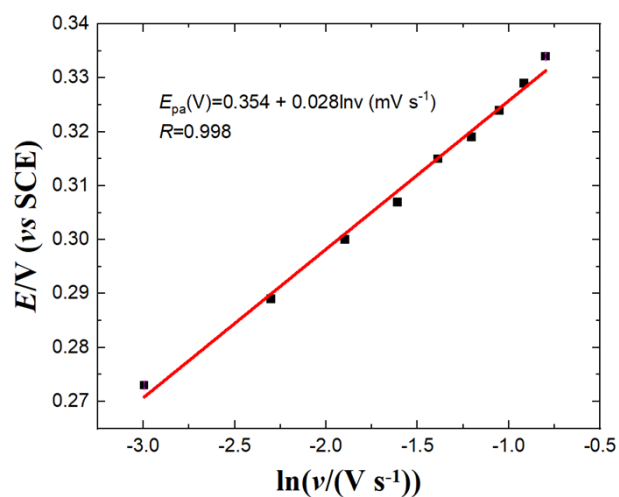

**Fig.S1** Linear regression of anodic peak potential ( $E_{pa}$ ) versus natural logarithm of the scan rate ( $\ln v$ )

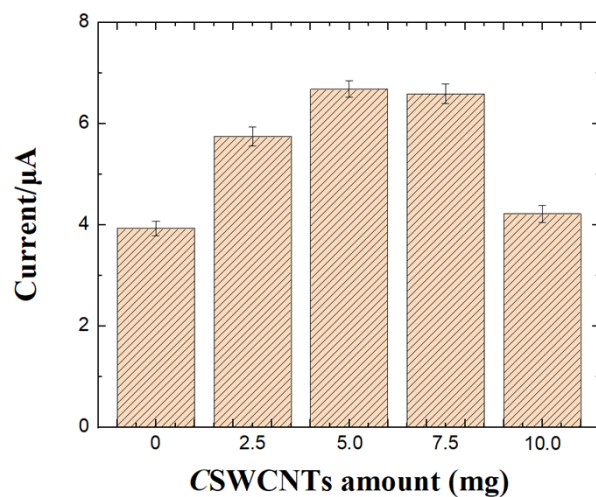

**Fig.S2** Influence of CSWCNTs addition on the electrochemical response of  $2.0 \times 10^{-5}$  mol L<sup>-1</sup> 2,4-DAT at the ErGO-CSWCNTs/GCE

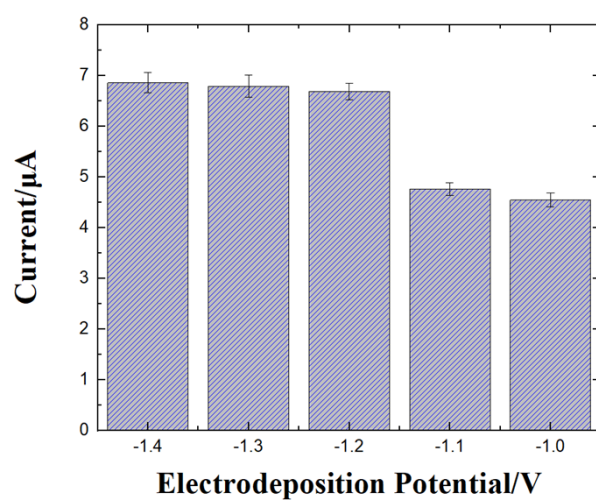

**Fig.S3** Influence of electrodeposition potential ( $E_r$ ) on the electrochemical response of  $2.0 \times 10^{-5}$  mol L<sup>-1</sup> 2,4-DAT at the ErGO-CSWCNTs/GCE

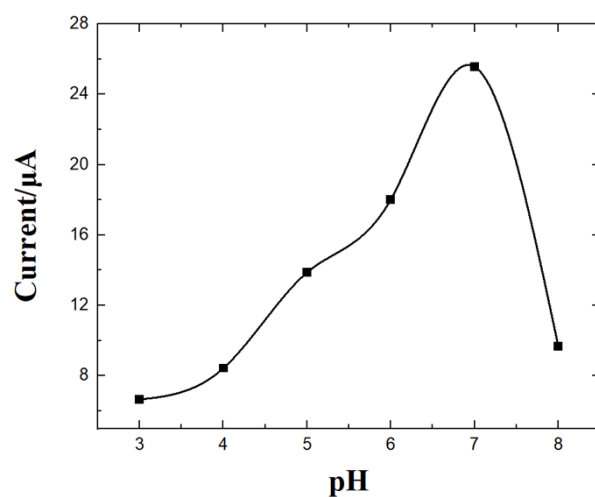

**Fig.S4** Influence of pH on the anodic peak current (solution containing  $2.0 \times 10^{-5}$  mol L<sup>-1</sup> 2,4-DAT) at the ErGO-CSWCNTs/GCE

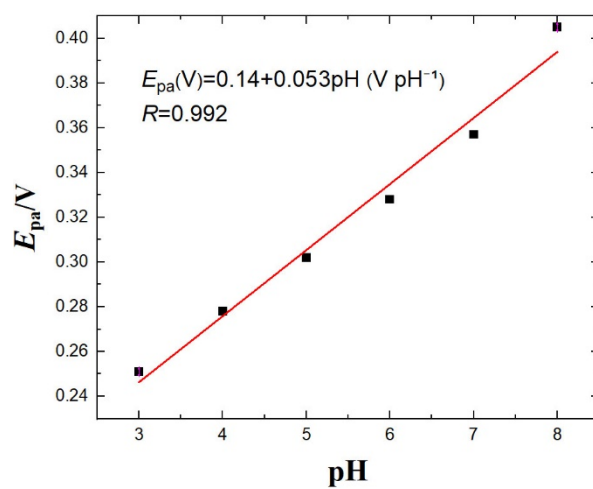

**Fig.S5** Linear regression of anodic peak potential ( $E_{pa}$ ) versus pH
